# Supplementary material for: Non-trioctylphosphine and chemical aerosol flow growth of high quality thiol-capped CdSe nanocrystals
Source: Royal Society of Chemistry journal article supplement (doi:10.1039/c2ce06523a), 2012-01-01
Supplement: c2ce06523a.pdf [file c2ce06523a.pdf]

**Electronic Supplementary Information (ESI) for**

**Non-trioctylphosphine and chemical aerosol flow  
Growth of high quality thiol-capped CdSe nanocrystals**

Chuanmiao Yan<sup>a,b</sup> Zhengtao Deng<sup>a</sup>, Fangqiong Tang<sup>a,\*</sup>, Linlin Li<sup>a</sup>, Dong Chen<sup>a</sup>, Jun Ren<sup>a,\*</sup>

*a.* Laboratory of Controllable Preparation and Application of Nanomaterials, Technical  
Institute of Physics and Chemistry, Chinese Academy of Sciences, Beijing 100190  
(P.R.China)

*b.* Graduate School of the Chinese Academy of Sciences, Beijing 100049 (P.R.China)

\* Authors to whom correspondence should be addressed.

\* Prof. Fangqiong Tang

Email: tangfq@mail.ipc.ac.cn, Fax: +8610-62554670, Tel: +8610-82543521

\* Prof. Jun Ren

Email: rj@mail.ipc.ac.cn

Technical Institute of Physics and Chemistry, Chinese Academy of Sciences, 29  
Zhongguancun East Road, Beijing 100190 (P.R.China)

| Gas flow<br>(L/min) | Heat time<br>(second) | Absorption<br>peak(nm) | Size calculated<br>(nm) |
|---------------------|-----------------------|------------------------|-------------------------|
| 0.5                 | 22.61                 | 457                    | 2.00                    |
| 1                   | 11.30                 | 450                    | 1.95                    |
| 1.5                 | 7.54                  | 448                    | 1.94                    |
| 2                   | 5.65                  | 445                    | 1.91                    |
| 2.5                 | 4.52                  | 437                    | 1.85                    |
| 3                   | 3.77                  | 435                    | 1.84                    |

Table S1. The relationship between gas flow and nanocrystals size. The nanocrystals size was calculated according to the equation given by Peng X G *et.al.*<sup>1</sup>

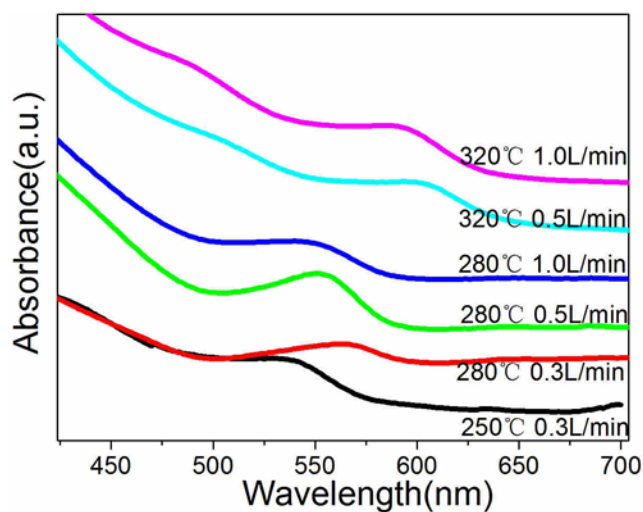

**Fig. S1** The absorption spectra of oleic acid capped CdSe QDs with different temperatures and flow rates.

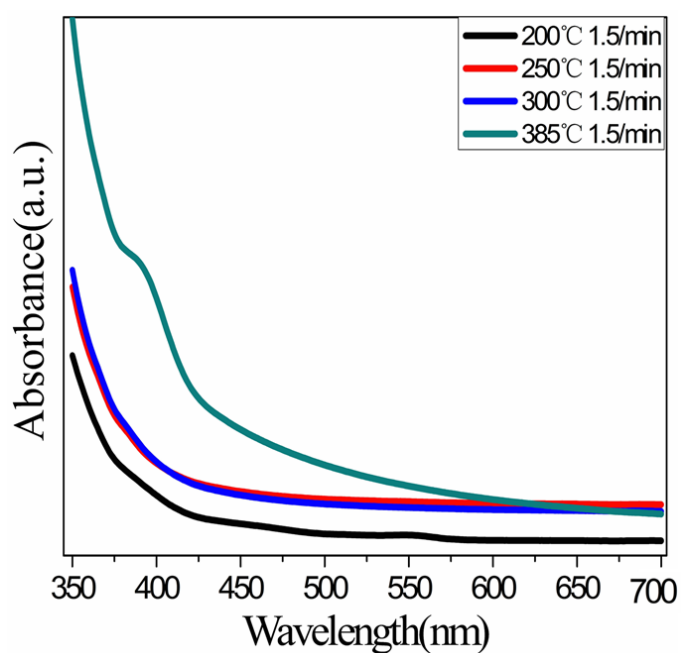

**Fig. S2** The absorption spectra when only Cd(OA)<sub>2</sub> and DDT were added.

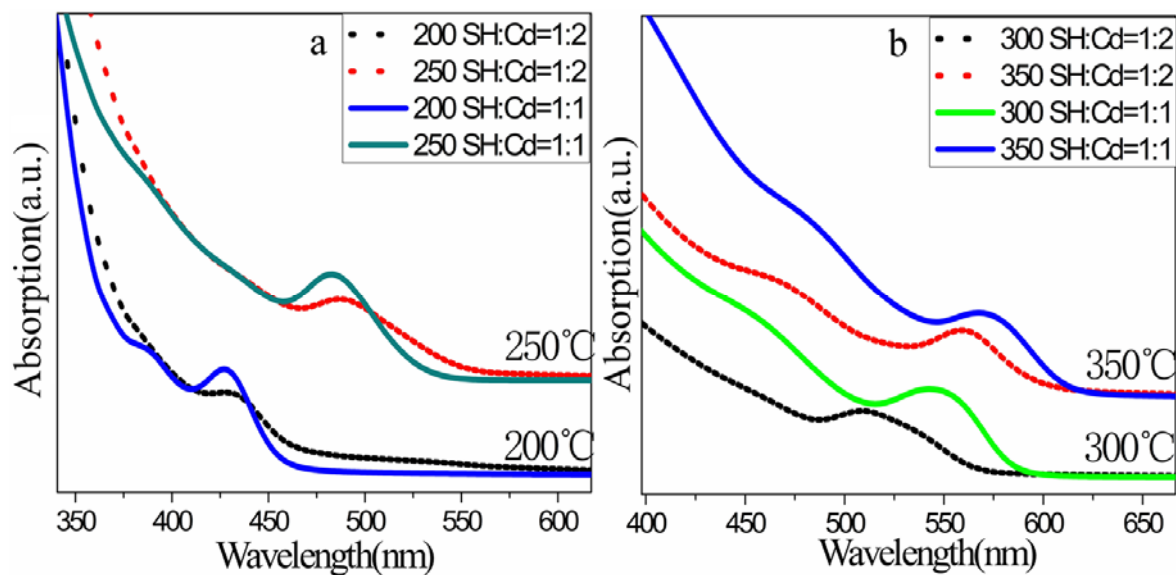

**Fig. S3** (a) The absorption spectra of CdSe synthesized at 200 °C and 250 °C. (b) The absorption spectra of CdSe synthesized at 300 °C and 350 °C.

Reference:

1. Yu, W. W.; Qu, L.; Guo, W.; Peng, X., Experimental Determination of the Extinction Coefficient of CdTe, CdSe, and CdS Nanocrystals. *Chem. Mater.* **2003**, *15*, 2854-2860.
